# Supplementary material for: Analysis of Prescriptions Dispensed After Death and Associated Medicare Spending Following Reimbursement Policy Changes in Medicare
Source: PubMed Central journal article supplement (PMC10214031; doi:10.1001/jamanetworkopen.2023.14357), 2023-05-25
Supplement: jamanetwopen-e2314357-s002.pdf [file jamanetwopen-e2314357-s002.pdf]

## Data Sharing Statement

Vouri. Analysis of Prescriptions Dispensed After Death and Associated Medicare Spending Following Reimbursement Policy Changes in Medicare. *JAMA Netw Open*. Published May 25, 2023. doi:10.1001/jamanetworkopen.2023.14357

### Data

**Data available:** No

### Additional Information

**Explanation for why data not available:** Limited by the DUA with CMS
